# Supplementary material for: Measurement properties of the PBC-40 and PBC-27: a Dutch validation study
Source: PubMed Central journal article supplement — BMJ Open Gastroenterol. 2021 Dec 16;8(1):e000758. doi: 10.1136/bmjgast-2021-000758 (PMC8679126; doi:10.1136/bmjgast-2021-000758), 2021-12-16
Supplement: bmjgast-2021-000758supp001.pdf [file bmjgast-2021-000758supp001.pdf]

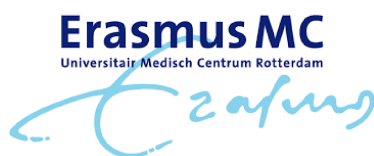

## Vragenlijst PBC-40

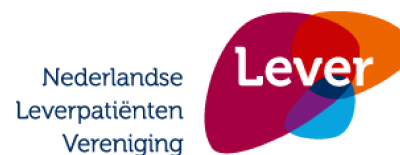

Naam: \_\_\_\_\_ Datum: \_\_\_\_\_

Omcirkel voor elke stelling het antwoord welke het beste aangeeft hoe u zich voelt. Als een van de stellingen niet op u van toepassing is, omcirkel dan 'niet van toepassing'.

Kunt u aangeven hoe vaak de volgende stellingen over de spijsvertering en eetpatroon op u van toepassing zijn geweest IN DE AFGELOPEN VIER WEKEN?

- |                                                                                    |       |        |      |         |        |                                             |
|------------------------------------------------------------------------------------|-------|--------|------|---------|--------|---------------------------------------------|
| 1. Ik was in staat om te eten wat ik lekker vond                                   | Nooit | Zelden | Soms | Meestal | Altijd |                                             |
| 2. Ik at of dronk alleen kleine hoeveelheden, ondanks dat voelde ik mij opgeblazen | Nooit | Zelden | Soms | Meestal | Altijd |                                             |
| 3. Ik voelde mij niet lekker na het drinken van alcohol                            | Nooit | Zelden | Soms | Meestal | Altijd | Niet van toepassing /ik drink nooit alcohol |

IN DE AFGELOPEN VIER WEKEN; hoe vaak heeft u het volgende ervaren?

- |                                              |       |        |      |         |        |
|----------------------------------------------|-------|--------|------|---------|--------|
| 4. Ik ervaarde ongemak in mijn rechter flank | Nooit | Zelden | Soms | Meestal | Altijd |
| 5. Ik had droge ogen                         | Nooit | Zelden | Soms | Meestal | Altijd |

- |                                                                           |       |        |      |         |        |
|---------------------------------------------------------------------------|-------|--------|------|---------|--------|
| 6. Mijn mond was zeer droog                                               | Nooit | Zelden | Soms | Meestal | Altijd |
| 7. Ik had pijn in de botten (lange pijpbeenderen) van mijn armen en benen | Nooit | Zelden | Soms | Meestal | Altijd |

**Sommige mensen met Primaire Biliaire Cholangitis (PBC) ervaren jeuk. Hoe vaak heeft u jeuk ervaren in de AFGELOPEN VIER WEKEN? Indien u geen jeuk heeft gehad, omcirkel dan "niet van toepassing".**

- |                                                        |       |        |      |         |        |                                          |
|--------------------------------------------------------|-------|--------|------|---------|--------|------------------------------------------|
| 8. Jeuk verstoorte mijn slaap                          | Nooit | Zelden | Soms | Meestal | Altijd | Niet van toepassing/<br>ik had geen jeuk |
| 9. Ik heb zoveel gekrabd dat ik mijn huid kapot maakte | Nooit | Zelden | Soms | Meestal | Altijd | Niet van toepassing/<br>ik had geen jeuk |
| 10. Ik schaamde mij vanwege het krabben door de jeuk   | Nooit | Zelden | Soms | Meestal | Altijd | Niet van toepassing/<br>ik had geen jeuk |

**Vermoeidheid kan ook een probleem zijn voor veel mensen met PBC. Hoe vaak waren de volgende stellingen op u van toepassing IN DE AFGELOPEN VIER WEKEN?**

- |                                                                                        |       |        |      |         |        |
|----------------------------------------------------------------------------------------|-------|--------|------|---------|--------|
| 11. Ik moest mijzelf dwingen om uit bed te komen                                       | Nooit | Zelden | Soms | Meestal | Altijd |
| 12. Ik moest overdag slapen                                                            | Nooit | Zelden | Soms | Meestal | Altijd |
| 13. Vermoeidheid verstoorte mijn dagelijkse routine                                    | Nooit | Zelden | Soms | Meestal | Altijd |
| 14. Ik voelde mij uitgeput                                                             | Nooit | Zelden | Soms | Meestal | Altijd |
| 15. Ik was zo moe, dat ik mijzelf moest dwingen om de dingen te doen die ik moest doen | Nooit | Zelden | Soms | Meestal | Altijd |

- |                                                        |       |        |      |         |        |
|--------------------------------------------------------|-------|--------|------|---------|--------|
| 16. Ik was zo moe, dat ik vroeg naar bed moest         | Nooit | Zelden | Soms | Meestal | Altijd |
| 17. De vermoeidheid overviel mij plotseling            | Nooit | Zelden | Soms | Meestal | Altijd |
| 18. PBC heeft elke greintje energie uit mij weggezogen | Nooit | Zelden | Soms | Meestal | Altijd |

**Het volgende deel gaat over de inspanning en de planning die mogelijk komen kijken bij een leven met PBC. Als u denkt aan de AFGELOPEN VIER WEKEN, hoe vaak waren de volgende stellingen dan op u van toepassing?**

- |                                                                                  |       |        |      |         |        |
|----------------------------------------------------------------------------------|-------|--------|------|---------|--------|
| 19. Op sommige dagen kostte het mij veel tijd om ook maar iets te doen           | Nooit | Zelden | Soms | Meestal | Altijd |
| 20. Als ik een drukke dag had, dan had ik minstens één dag nodig om bij te komen | Nooit | Zelden | Soms | Meestal | Altijd |
| 21. Ik moest mijn tempo aanpassen voor de dagelijkse dingen                      | Nooit | Zelden | Soms | Meestal | Altijd |

**De volgende stellingen gaan over de mogelijke gevolgen van PBC op bijvoorbeeld het geheugen en concentratie. Als u terugdenkt aan de AFGELOPEN VIER WEKEN hoe vaak waren de volgende stellingen op u van toepassing?**

- |                                                                                            |       |        |      |         |        |
|--------------------------------------------------------------------------------------------|-------|--------|------|---------|--------|
| 22. Vanwege PBC moest ik veel moeite doen om dingen te onthouden                           | Nooit | Zelden | Soms | Meestal | Altijd |
| 23. Vanwege PBC vond ik het lastig om dingen te herinneren die de dag ervoor waren gebeurd | Nooit | Zelden | Soms | Meestal | Altijd |
| 24. Mijn spanningsboog was kort door PBC                                                   | Nooit | Zelden | Soms | Meestal | Altijd |
| 25. Vanwege PBC had ik moeite met het volgen van gesprekken                                | Nooit | Zelden | Soms | Meestal | Altijd |

- |                                                                              |       |        |      |         |        |
|------------------------------------------------------------------------------|-------|--------|------|---------|--------|
| 26. Vanwege PBC, vond ik het moeilijk mij ergens op te concentreren          | Nooit | Zelden | Soms | Meestal | Altijd |
| 27. Vanwege PBC, vond ik het moeilijk om te onthouden wat ik wilde gaan doen | Nooit | Zelden | Soms | Meestal | Altijd |

**Hieronder staan wat meer algemene stellingen over hoe PBC van invloed kan zijn op u als persoon. In welke mate zijn de volgende stellingen op u van toepassing?**

- |                                                                                       |               |            |           |          |           |                     |
|---------------------------------------------------------------------------------------|---------------|------------|-----------|----------|-----------|---------------------|
| 28. Vanwege PBC, raak ik meer gestrest over dingen dan voorheen                       | Helemaal niet | Een beetje | Enigszins | Best wel | Heel veel |                     |
| 29. Mijn seksleven wordt beïnvloed door PBC                                           | Helemaal niet | Een beetje | Enigszins | Best wel | Heel veel | Niet van toepassing |
| 30. Het hebben van PBC maakt mij soms somber                                          | Helemaal niet | Een beetje | Enigszins | Best wel | Heel veel |                     |
| 31. Ik heb het gevoel dat ik mijn familie verwaarloos doordat ik PBC heb              | Helemaal niet | Een beetje | Enigszins | Best wel | Heel veel | Niet van toepassing |
| 32. Ik voel mij schuldig dat ik niet kan doen wat ik voorheen deed doordat ik PBC heb | Helemaal niet | Een beetje | Enigszins | Best wel | Heel veel |                     |
| 33. Ik maak mij zorgen over hoe mijn PBC in de toekomst zal zijn                      | Helemaal niet | Een beetje | Enigszins | Best wel | Heel veel |                     |

**De volgende stellingen hebben betrekking op de mogelijke invloed van PBC op uw sociale leven. Denkend aan uw eigen situatie, in welke mate bent u het eens of oneens met de stellingen?**

|                                                                                     |                     |            |                               |          |               |
|-------------------------------------------------------------------------------------|---------------------|------------|-------------------------------|----------|---------------|
| 34. Soms voel ik mij gefrustreerd dat ik niet op pad kan gaan en plezier kan hebben | Helemaal mee oneens | Mee oneens | Niet mee eens/niet mee oneens | Mee eens | Helemaal eens |
| 35. Ik ben geneigd om het feit dat ik PBC heb voor mijzelf te houden                | Helemaal mee oneens | Mee oneens | Niet mee eens/niet mee oneens | Mee eens | Helemaal eens |
| 36. Ik kan geen vakanties plannen omdat ik PBC heb                                  | Helemaal mee oneens | Mee oneens | Niet mee eens/niet mee oneens | Mee eens | Helemaal eens |
| 37. Ik heb bijna geen sociaal leven meer                                            | Helemaal mee oneens | Mee oneens | Niet mee eens/niet mee oneens | Mee eens | Helemaal eens |

**Het volgende deel gaat over de mogelijke impact van PBC op uw leven in het algemeen. In hoeverre bent u het eens of oneens met de volgende stellingen?**

|                                                                                 |                     |            |                               |          |               |
|---------------------------------------------------------------------------------|---------------------|------------|-------------------------------|----------|---------------|
| 38. Alles in mijn leven wordt beïnvloed door PBC                                | Helemaal mee oneens | Mee oneens | Niet mee eens/niet mee oneens | Mee eens | Helemaal eens |
| 39. PBC heeft mijn kwaliteit van leven verminderd                               | Helemaal mee oneens | Mee oneens | Niet mee eens/niet mee oneens | Mee eens | Helemaal eens |
| 40. Ik kan nog steeds een normaal leven leiden, ondanks het feit dat ik PBC heb | Helemaal mee oneens | Mee oneens | Niet mee eens/niet mee oneens | Mee eens | Helemaal eens |

**- EINDE VAN DEZE VRAGENLIJST -**

*Hartelijk dank voor het invullen van de vragenlijst.*
